# Supplementary material for: Genome-Wide Analysis of the LATERAL ORGAN BOUNDARIES Domain (LBD) Members in Alfalfa and the Involvement of MsLBD48 in Nitrogen Assimilation
Source: MDPI journal article supplement (doi:10.3390/ijms24054644), 2023-02-28
Supplement: s1 [file s1]

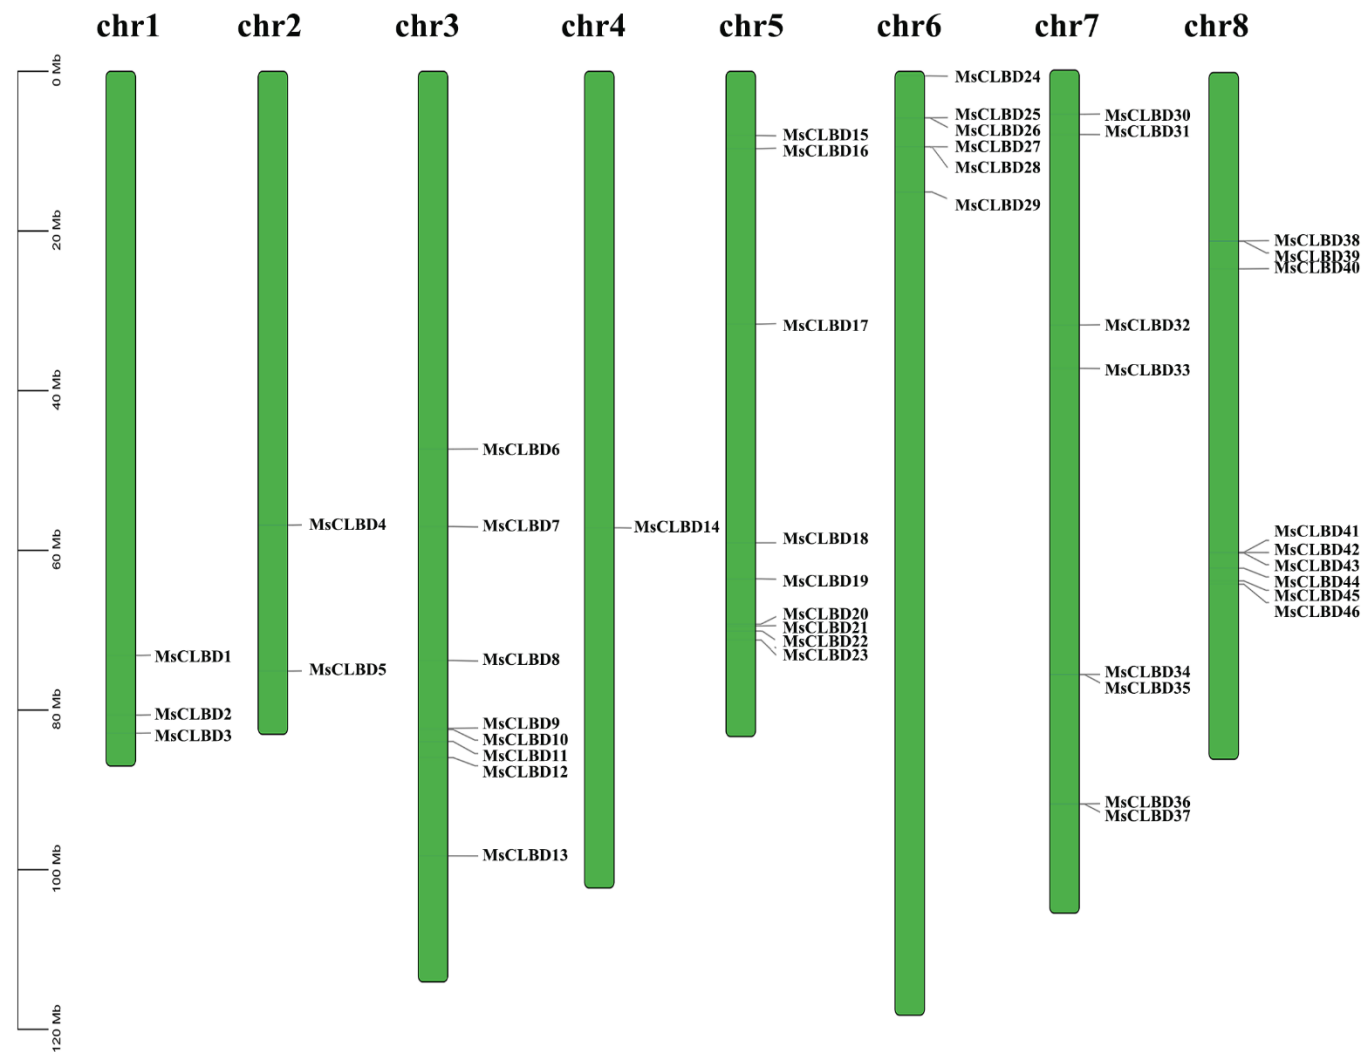

Figure S2. Distribution of the *MsCLBDs* in *M. sativa* spp. *Caerulea* chromosome. *MsCLBDs*, *M. sativa* spp. *Caerulea* lateral organ boundaries domain genes.

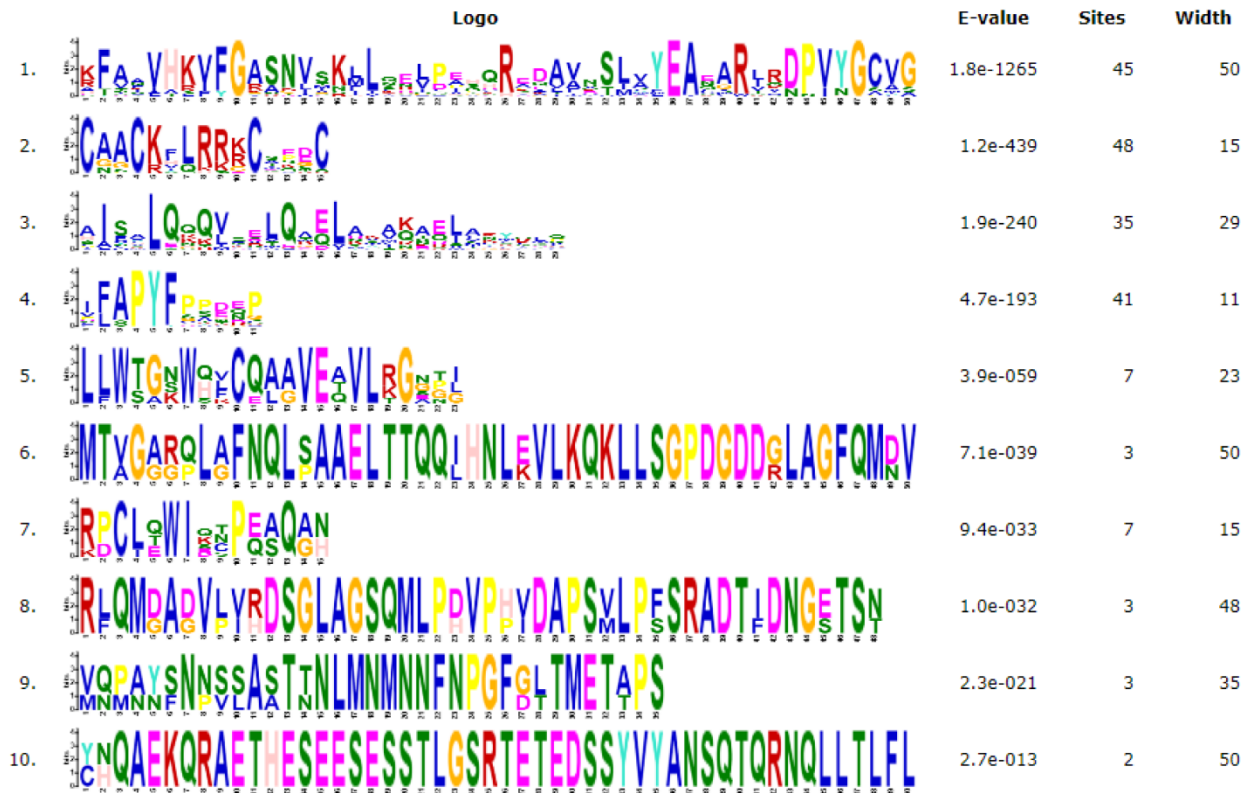

Figure S3. Conserved motifs of MsLBDs proteins

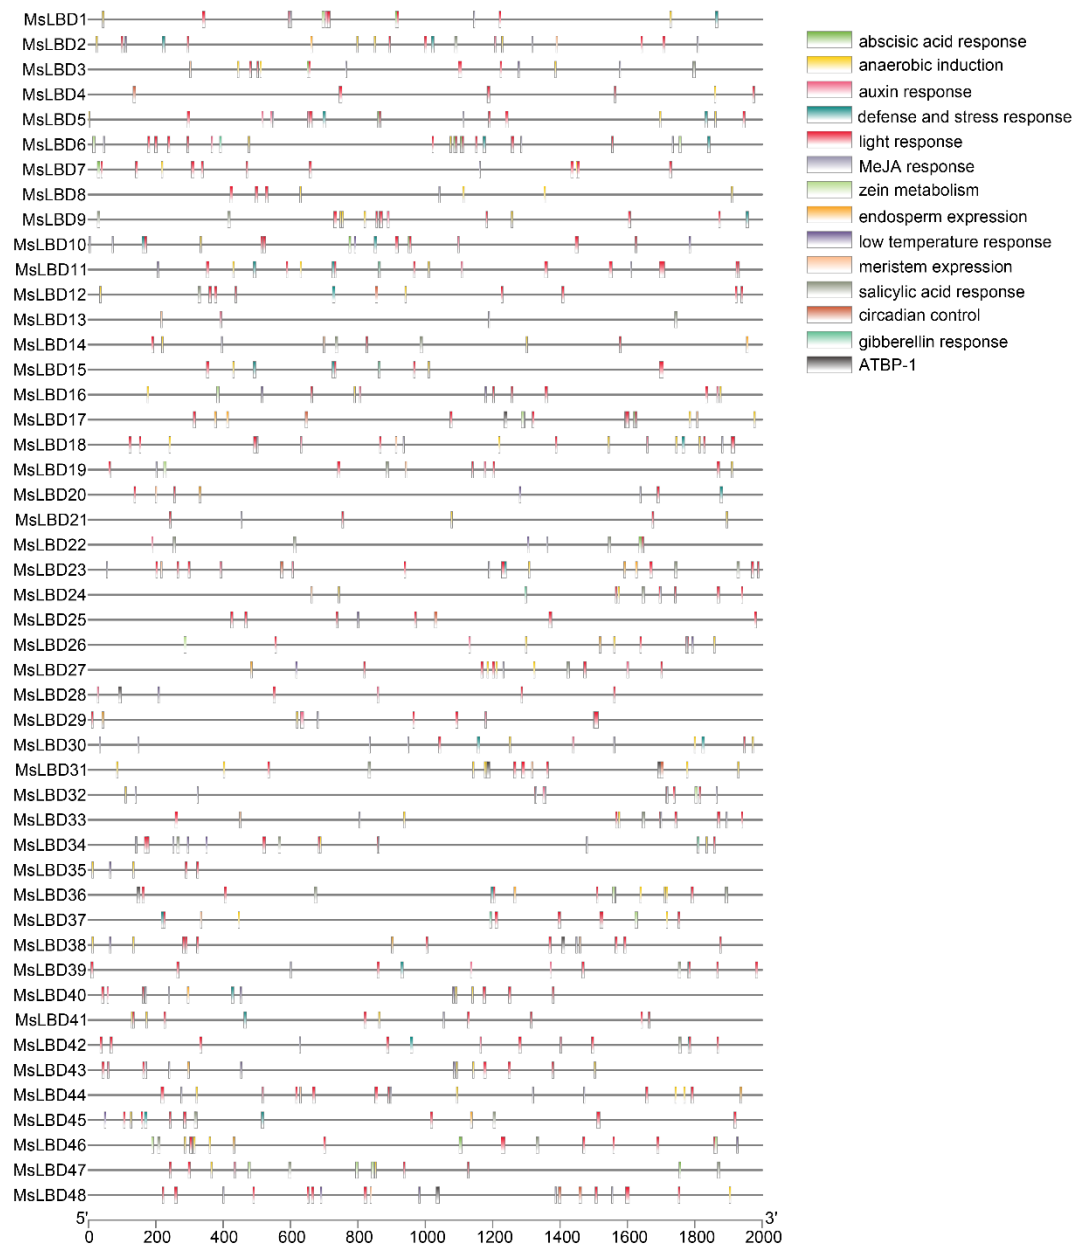

Figure S4. Promoter element of *MsLBDs* genes

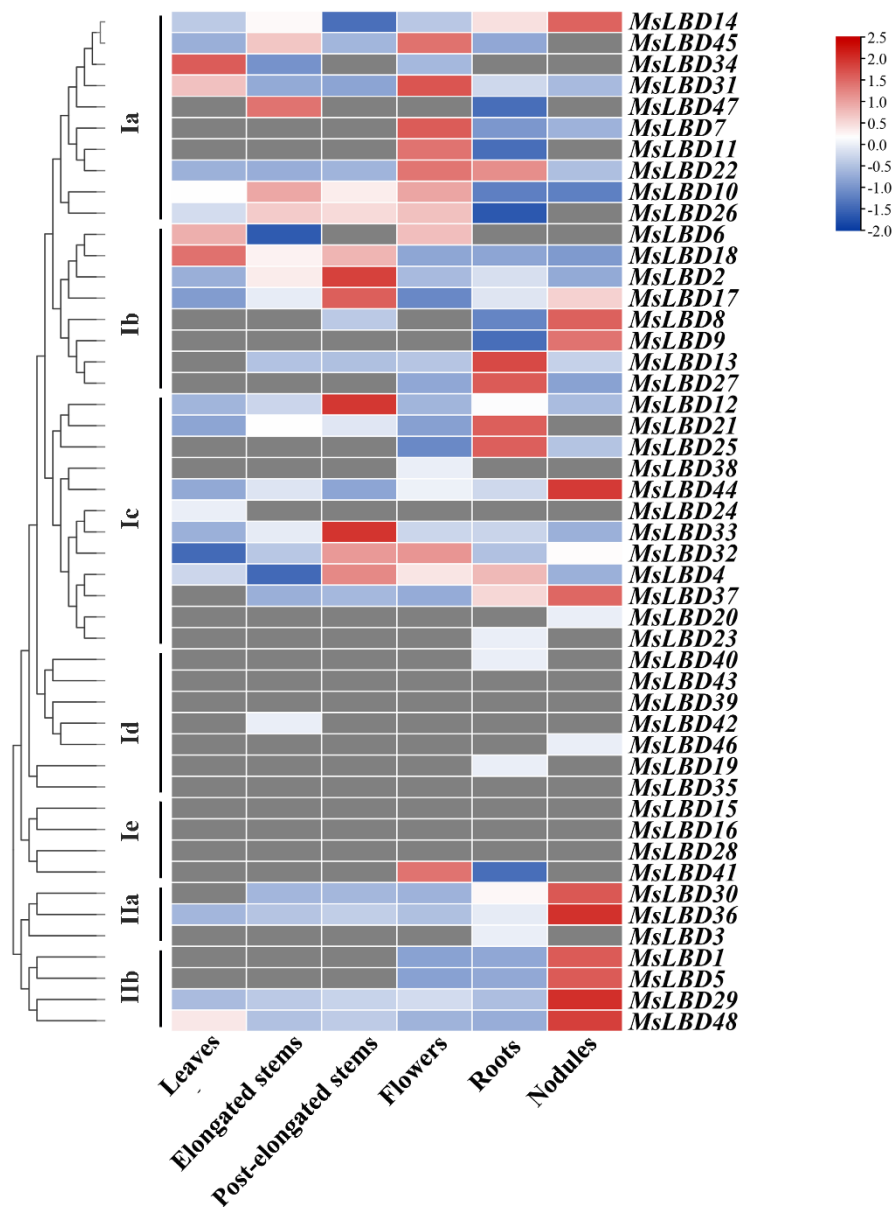

Figure S5. Heatmap of the expression profile of *MsLBD* genes. The relative expression of each *MsLBD* gene was normalized by TBtools software in different tissue. Blue indicated down-regulation, red for up-regulation, the grey for genes undetected in the RNA sequencing data.

Table S1 Basic information of the putative MsLBDs in alfalfa

| Gene_name | Gene_id       | Location                 | Size     | MW(kDa) | pI   | Location prediction |
|-----------|---------------|--------------------------|----------|---------|------|---------------------|
| MsLBD14   | MS.gene022331 | chr3.4:74172606:74173187 | 193 a.a. | 20.94   | 7.63 | nucleus             |
| MsLBD45   | MS.gene011318 | chr8.4:21137334:21137906 | 190 a.a. | 20.71   | 7.63 | nucleus             |
| MsLBD34   | MS.gene30077  | chr7.1:63714330:63714848 | 172 a.a. | 18.77   | 5.52 | nucleus             |
| MsLBD31   | MS.gene032616 | chr6.3:1161920:1162375   | 151 a.a. | 16.62   | 6.57 | nucleus             |
| MsLBD47   | MS.gene87198  | chr8.4:58297179:58297874 | 231 a.a. | 25.39   | 8.26 | nucleus             |
| MsLBD7    | MS.gene068854 | chr3.2:41474825:41475718 | 297 a.a. | 31.9    | 5.91 | nucleus             |
| MsLBD11   | MS.gene35626  | chr3.3:63690097:63690793 | 204 a.a. | 22.72   | 8.71 | nucleus             |
| MsLBD22   | MS.gene010395 | chr5.4:10916826:10917782 | 318 a.a. | 34.77   | 6.56 | nucleus             |
| MsLBD10   | MS.gene008030 | chr3.3:62078169:62078726 | 185 a.a. | 20.59   | 8.1  | nucleus             |
| MsLBD26   | MS.gene94227  | chr5.4:65755991:65756530 | 179 a.a. | 19.98   | 6.81 | nucleus             |
| MsLBD6    | MS.gene31331  | chr2.4:8424586:8427204:- | 174 a.a. | 19.46   | 5.16 | nucleus             |
| MsLBD18   | MS.gene049862 | chr4.4:44081649:44083790 | 185 a.a. | 20.26   | 5.49 | nucleus             |
| MsLBD2    | MS.gene54754  | chr1.2:72649812:72651370 | 230 a.a. | 25.22   | 6.43 | nucleus             |
| MsLBD17   | MS.gene56569  | chr4.4:29258656:29262353 | 174 a.a. | 18.92   | 7.7  | nucleus             |
| MsLBD8    | MS.gene92645  | chr3.3:33819966:33823100 | 147 a.a. | 16.56   | 8.54 | nucleus             |
| MsLBD9    | MS.gene048563 | chr3.3:53189343:53190643 | 176 a.a. | 19.7    | 5.88 | nucleus             |
| MsLBD13   | MS.gene031929 | chr3.4:70837285:70838290 | 160 a.a. | 18.06   | 7.64 | nucleus             |
| MsLBD27   | MS.gene29689  | chr5.1:65545351:65546630 | 166 a.a. | 18.69   | 6.5  | nucleus             |
| MsLBD12   | MS.gene31052  | chr3.3:78615404:78616107 | 205 a.a. | 22.45   | 8.63 | nucleus             |
| MsLBD21   | MS.gene98872  | chr5.2:71826185:71827588 | 196 a.a. | 21.83   | 7.64 | nucleus             |
| MsLBD25   | MS.gene26285  | chr5.4:59341388:59342282 | 142 a.a. | 15.56   | 6.41 | nucleus             |
| MsLBD38   | MS.gene96098  | chr7.4:30185115:30188016 | 197 a.a. | 21.91   | 6.58 | nucleus             |
| MsLBD44   | MS.gene019357 | chr8.3:59598280:59606588 | 259 a.a. | 28.31   | 6.49 | nucleus             |
| MsLBD24   | MS.gene032845 | chr5.4:29480141:29480862 | 202 a.a. | 21.58   | 9.35 | nucleus             |
| MsLBD33   | MS.gene47300  | chr6.4:2862808:2863768   | 227 a.a. | 24.44   | 9.2  | nucleus             |
| MsLBD32   | MS.gene49826  | chr6.3:19474848:19475838 | 209 a.a. | 23.06   | 8.78 | nucleus             |
| MsLBD4    | MS.gene39880  | chr1.3:50204038:50205951 | 204 a.a. | 22.38   | 6.79 | nucleus             |
| MsLBD37   | MS.gene23507  | chr7.3:14703507:14704706 | 218 a.a. | 24.15   | 7.05 | nucleus             |
| MsLBD20   | MS.gene57863  | chr5.2:68313632:68314864 | 194 a.a. | 21.3    | 5.67 | nucleus             |
| MsLBD23   | MS.gene027499 | chr5.4:26000842:26002006 | 224 a.a. | 25.16   | 5.94 | nucleus             |
| MsLBD40   | MS.gene011859 | chr8.2:26259985:26260641 | 218 a.a. | 24.31   | 5.76 | nucleus             |
| MsLBD43   | MS.gene87329  | chr8.3:24663882:24664565 | 227 a.a. | 25.15   | 5.57 | nucleus             |
| MsLBD39   | MS.gene44932  | chr8.1:28095019:28095934 | 231 a.a. | 24.87   | 5.05 | nucleus             |
| MsLBD42   | MS.gene87327  | chr8.3:24626480:24627396 | 271 a.a. | 29.32   | 5.5  | nucleus             |
| MsLBD46   | MS.gene28573  | chr8.4:27097987:27098778 | 263 a.a. | 28.09   | 6.24 | nucleus             |
| MsLBD19   | MS.gene062277 | chr5.1:74140421:74141954 | 157 a.a. | 18.1    | 8.98 | nucleus             |
| MsLBD35   | MS.gene98098  | chr7.2:71052146:71052981 | 157 a.a. | 18.01   | 8.23 | nucleus             |
| MsLBD15   | MS.gene39546  | chr4.2:23249084:23249914 | 276 a.a. | 31.48   | 8.74 | nucleus             |
| MsLBD16   | MS.gene045528 | chr4.3:29689620:29690594 | 196 a.a. | 22.78   | 8.75 | nucleus             |
| MsLBD28   | MS.gene057889 | chr5.3:69179502:69180203 | 233 a.a. | 26.31   | 5.1  | nucleus             |
| MsLBD41   | MS.gene72374  | chr8.3:21407143:21407616 | 157 a.a. | 17.37   | 7.65 | nucleus             |
| MsLBD30   | MS.gene074251 | chr6.2:14344708:14346344 | 278 a.a. | 30.54   | 8.03 | nucleus             |
| MsLBD36   | MS.gene76902  | chr7.2:91305148:91306331 | 301 a.a. | 32.99   | 8.07 | nucleus             |
| MsLBD3    | MS.gene71832  | chr1.3:75557737:75558748 | 231 a.a. | 25.24   | 8.99 | nucleus             |
| MsLBD1    | MS.gene76816  | chr1.1:76542635:76543444 | 212 a.a. | 23.8    | 5.74 | nucleus             |
| MsLBD5    | MS.gene71626  | chr1.4:82355009:82355729 | 179 a.a. | 19.96   | 5.93 | nucleus             |
| MsLBD29   | MS.gene57207  | chr5.3:8766360:8767197   | 231 a.a. | 25.2    | 8.62 | nucleus             |
| MsLBD48   | MS.gene041894 | 32644:18066:18887        | 233 a.a. | 25.29   | 8.1  | nucleus             |

Note: *M. sativa* LATERAL ORGAN BOUNDARIES DOMAIN transcription factors(MsLBDs).

Table S2 Preliminary information of the putative MsCLBDs in *M. sativa* spp. *Caerulea*

| Gene name | Gene_id    | Location                 | Size     | MW (kDa) | pI   | Location prediction |
|-----------|------------|--------------------------|----------|----------|------|---------------------|
| MsCLBD12  | MsaT015364 | Chr3: 85959009: 85959590 | 193 a.a. | 20.93    | 7.8  | nucleus             |
| MsCLBD26  | MsaT030281 | Chr6: 5819528: 5819983   | 151 a.a. | 16.62    | 6.57 | nucleus             |
| MsCLBD27  | MsaT030282 | Chr6: 5831713: 5832141   | 142 a.a. | 15.84    | 6.18 | nucleus             |
| MsCLBD31  | MsaT036548 | Chr7: 37357894: 37358412 | 172 a.a. | 18.83    | 5.52 | nucleus             |
| MsCLBD40  | MsaT042594 | Chr8: 24599747: 24600418 | 223 a.a. | 24.47    | 8.26 | nucleus             |
| MsCLBD7   | MsaT013595 | Chr3: 57010098: 57010985 | 295 a.a. | 31.78    | 5.83 | nucleus             |
| MsCLBD11  | MsaT015211 | Chr3: 83940752: 83941358 | 204 a.a. | 22.75    | 8.71 | nucleus             |
| MsCLBD23  | MsaT025540 | Chr5: 9684729: 9685685   | 318 a.a. | 34.77    | 6.56 | nucleus             |
| MsCLBD18  | MsaT028821 | Chr5: 69255786: 69256319 | 177 a.a. | 19.79    | 6.81 | nucleus             |
| MsCLBD9   | MsaT015066 | Chr3: 82291736: 82292293 | 185 a.a. | 20.59    | 8.1  | nucleus             |
| MsCLBD8   | MsaT014481 | Chr3: 73792224: 73792595 | 176 a.a. | 19.69    | 5.88 | nucleus             |
| MsCLBD10  | MsaT015081 | Chr3: 82450564: 82450881 | 159 a.a. | 17.92    | 7.64 | nucleus             |
| MsCLBD19  | MsaT028836 | Chr5: 69470495: 69470839 | 166 a.a. | 18.69    | 6.5  | nucleus             |
| MsCLBD6   | MsaT013281 | Chr3: 47321941: 47322096 | 145 a.a. | 16.3     | 7.61 | nucleus             |
| MsCLBD4   | MsaT009292 | Chr2: 56843376: 56843534 | 164 a.a. | 18.36    | 8.28 | nucleus             |
| MsCLBD1   | MsaT004729 | Chr1: 73159722: 73160078 | 230 a.a. | 25.22    | 6.43 | nucleus             |
| MsCLBD5   | MsaT010576 | Chr2: 75127349: 75127708 | 198 a.a. | 22.1     | 5.2  | nucleus             |
| MsCLBD14  | MsaT020688 | Chr4: 57175175: 57175369 | 185 a.a. | 20.26    | 5.49 | nucleus             |
| MsCLBD13  | MsaT016470 | Chr3: 98270810: 98271001 | 122 a.a. | 13.51    | 8.61 | nucleus             |
| MsCLBD20  | MsaT028887 | Chr5: 70118385: 70118398 | 196 a.a. | 21.8     | 7.64 | nucleus             |
| MsCLBD17  | MsaT028528 | Chr5: 63567376: 63567401 | 180 a.a. | 19.73    | 8.11 | nucleus             |
| MsCLBD38  | MsaT042385 | Chr8: 21091421: 21091448 | 273 a.a. | 29.36    | 8.76 | nucleus             |
| MsCLBD34  | MsaT038370 | Chr7: 75720732: 75721124 | 236 a.a. | 24.74    | 8.72 | nucleus             |
| MsCLBD39  | MsaT042387 | Chr8: 21145858: 21146196 | 216 a.a. | 23.6     | 7.1  | nucleus             |
| MsCLBD33  | MsaT038369 | Chr7: 75694211: 75694510 | 195 a.a. | 21.61    | 6.58 | nucleus             |
| MsCLBD37  | MsaT039690 | Chr7: 91946121: 91946402 | 223 a.a. | 24.93    | 5.93 | nucleus             |
| MsCLBD36  | MsaT039686 | Chr7: 91909434: 91909790 | 218 a.a. | 24.14    | 7.05 | nucleus             |
| MsCLBD16  | MsaT028214 | Chr5: 59062539: 59062817 | 193 a.a. | 21.26    | 5.84 | nucleus             |
| MsCLBD29  | MsaT030527 | Chr6: 9459093: 9459443   | 209 a.a. | 23.06    | 8.78 | nucleus             |
| MsCLBD28  | MsaT030526 | Chr6: 9454875: 9455180   | 227 a.a. | 24.44    | 9.2  | nucleus             |
| MsCLBD15  | MsaT026939 | Chr5: 31658872: 31659246 | 202 a.a. | 21.6     | 9.35 | nucleus             |
| MsCLBD30  | MsaT036316 | Chr7: 31931914: 31932234 | 156 a.a. | 17.82    | 8.23 | nucleus             |
| MsCLBD25  | MsaT029978 | Chr6: 570228: 570248     | 241 a.a. | 27.22    | 7.55 | nucleus             |
| MsCLBD21  | MsaT028964 | Chr5: 71237317: 71238012 | 231 a.a. | 26.25    | 5.68 | nucleus             |
| MsCLBD46  | MsaT044729 | Chr8: 64091129: 64091599 | 156 a.a. | 17.26    | 8.21 | nucleus             |
| MsCLBD42  | MsaT044430 | Chr8: 60119992: 60120492 | 166 a.a. | 18.88    | 6.9  | nucleus             |
| MsCLBD45  | MsaT044701 | Chr8: 63676605: 63676646 | 86 a.a.  | 9.65     | 7.73 | nucleus             |
| MsCLBD41  | MsaT044429 | Chr8: 60093732: 60094049 | 220 a.a. | 23.61    | 6.58 | nucleus             |
| MsCLBD43  | MsaT044434 | Chr8: 60184159: 60184953 | 264 a.a. | 28.91    | 5.6  | nucleus             |
| MsCLBD44  | MsaT044566 | Chr8: 62087191: 62087374 | 233 a.a. | 25.32    | 7.53 | nucleus             |
| MsCLBD22  | MsaT025414 | Chr5: 8043179: 8043690   | 231 a.a. | 25.07    | 8.4  | nucleus             |
| MsCLBD2   | MsaT005365 | Chr6: 80640560: 80641011 | 211 a.a. | 23.66    | 5.96 | nucleus             |
| MsCLBD3   | MsaT005565 | Chr1: 82906029: 82906528 | 231 a.a. | 25.24    | 8.99 | nucleus             |
| MsCLBD24  | MsaT030850 | Chr6: 15116464: 15117110 | 278 a.a. | 30.43    | 8.03 | nucleus             |
| MsCLBD35  | MsaT035149 | Chr7: 8072569: 8072758   | 301 a.a. | 32.99    | 8.56 | nucleus             |
| MsCLBD32  | MsaT034983 | Chr7: 5538972: 5539161   | 301 a.a. | 32.96    | 8.07 | nucleus             |

Note: *M. sativa* spp. *Caerulea* LATERAL ORGAN BOUNDARIES DOMAIN transcription factors(MsCLBDs).

Table S3 Classification of the LBD members in select species.

|                 | <i>M. sativa</i> L.<br>Xinjiandaye<br>(4x = 32) | <i>M. sativa</i> spp.<br><i>Caerulea</i><br>(2x = 16) | <i>M. truncatula</i><br>(2x = 16) | <i>A.thaliana</i><br>(2x = 10) | Average |
|-----------------|-------------------------------------------------|-------------------------------------------------------|-----------------------------------|--------------------------------|---------|
| Genome (Mb)     | 3,150                                           | 793.2                                                 | 420                               | 125                            |         |
| No. LBDs        | 48                                              | 46                                                    | 57                                | 42                             | 48.25   |
| <b>Class I</b>  |                                                 |                                                       |                                   |                                |         |
| I a             | 10 (20.83%)                                     | 10 (21.74%)                                           | 11 (19.30%)                       | 6 (14.29%)                     | 19.04%  |
| I b             | 11 (22.92%)                                     | 11 (23.91%)                                           | 11 (19.30%)                       | 7 (16.67%)                     | 20.70%  |
| I c             | 9 (18.75%)                                      | 10 (21.74%)                                           | 11 (19.30%)                       | 10 (23.81%)                    | 20.90%  |
| I d             | 7 (14.58%)                                      | 5 (10.87%)                                            | 5 (8.77%)                         | 5 (11.90%)                     | 11.53%  |
| I e             | 4 (8.33%)                                       | 3 (6.52%)                                             | 10 (17.54%)                       | 8 (19.05%)                     | 12.86%  |
| sum             | 41 (85.42%)                                     | 39 (84.78%)                                           | 48 (84.21%)                       | 36 (85.71%)                    | 85.03%  |
| <b>Class II</b> |                                                 |                                                       |                                   |                                |         |
| II a            | 3 (6.25%)                                       | 4 (8.70%)                                             | 6 (10.53%)                        | 3 (7.14%)                      | 8.15%   |
| II b            | 4 (8.33%)                                       | 3 (6.52%)                                             | 3 (5.26%)                         | 3 (7.14%)                      | 6.82%   |
| sum             | 7 (14.58%)                                      | 7 (15.22%)                                            | 9 (15.79%)                        | 6 (14.29%)                     | 14.97%  |



Table S4 Homology analysis of MsLBDs from the different subclasses.

|      |                                | I a    | I b    | I c    | I d    | I e    | II a   | II b   |      |
|------|--------------------------------|--------|--------|--------|--------|--------|--------|--------|------|
|      | <div>maximum<br/>minimum</div> | 98.80% | 79%    | 74.10% | 64.20% | 50.60% | 30.90% | 32.10% | I a  |
| I a  | 60.50%                         |        | 91.40% | 79%    | 61.70% | 48.10% | 28.40% | 30.90% | I b  |
| I b  | 58%                            | 65.40% |        | 95.10% | 59.30% | 45.70% | 29.60% | 30.90% | I c  |
| I c  | 48.10%                         | 43.20% | 48.10% |        | 98.80% | 44.40% | 27.20% | 27.20% | I d  |
| I d  | 46.90%                         | 45.70% | 39.50% | 42%    |        | 70.40% | 29.60% | 33.30% | I e  |
| I e  | 33.30%                         | 35.80% | 28.40% | 30.90% | 30.90% |        | 91.40% | 72.80% | II a |
| II a | 25.60%                         | 22.20% | 23.50% | 21%    | 18.50% | 66.70% |        | 98.80% | II b |
| II b | 27.20%                         | 25.90% | 21%    | 21%    | 21%    | 54.30% | 76.50% |        |      |
|      | I a                            | I b    | I c    | I d    | I e    | II a   | II b   |        |      |

Table S5 Homology analysis of MsCLBDs from the different subclasses.

|     |                                | I a    | I b    | I c    | I d    | I e    | II a   | II b   |      |
|-----|--------------------------------|--------|--------|--------|--------|--------|--------|--------|------|
|     | <div>maximum<br/>minimum</div> | 98.00% | 73.50% | 74.10% | 59.20% | 61.20% | 32.70% | 26.50% | I a  |
| I a | 55.10%                         |        | 89.80% | 77.60% | 57.10% | 57.10% | 30.60% | 26.50% | Ib   |
| I b | 53.10%                         | 65.30% |        | 93.90% | 57.10% | 53.10% | 38.80% | 28.60% | Ic   |
| Ic  | 46.90%                         | 42.90% | 46.90% |        | 77.6%  | 55.10% | 24.50% | 20.40% | Id   |
| Id  | 40.80%                         | 40.80% | 32.70% | 42.90% |        | 79.60% | 26.50% | 20.40% | Ie   |
| Ie  | 36.70%                         | 38.80% | 34.70% | 36.70% | 53.10% |        | 95.90% | 73.50% | II a |
| IIa | 20.40%                         | 22.40% | 22.40% | 18.40% | 18.40% | 75.50% |        | 98.67% | II b |
| IIb | 16.30%                         | 16.30% | 18.40% | 16.30% | 14.30% | 51.00% | 67.30% |        |      |
|     | I a                            | I b    | I c    | I d    | I e    | II a   | II b   |        |      |

Table S6 sequence homology of MsLBD48 with three Arabidopsis LBD homologues

| protein |        | identity |        |      |  |
|---------|--------|----------|--------|------|--|
| MsLBD48 | 100%   |          |        |      |  |
| AtLBD37 | 61.60% | 100%     |        |      |  |
| AtLBD38 | 63.00% | 83.10%   | 100%   |      |  |
| AtLBD39 | 63.50% | 63.00%   | 64.80% | 100% |  |

Table S7 sequence of primers used in this study

| Gene            | Purpose/details  | Primer sequence (5' to 3')                                                                            |
|-----------------|------------------|-------------------------------------------------------------------------------------------------------|
| <i>MsLBD1</i>   | qRT-PCR          | F: 5'-GCAGTTGGGCTGTTATGGA-3'<br>R: 5'-ATCAGGGAGTGCGGTCAAT-3'                                          |
| <i>MsLBD3</i>   | qRT-PCR          | F: 5'-TGAAGCCCAAGCCACGAGTT-3'<br>R: 5'-AAGCCAAGAGTGAGTTCCAAAT-3'                                      |
| <i>MsLBD5</i>   | qRT-PCR          | F: 5'-TAACGCCACTGTCTTTGTC-3'<br>R: 5'-CCCAACTGCTCCATTTACT-3'                                          |
| <i>MsLBD18</i>  | qRT-PCR          | F: 5'-CTTCCCATAGCAATGGACAT-3'<br>R: 5'-TGAGCATAGGCTAGTGTTGT-3'                                        |
| <i>MsLBD29</i>  | qRT-PCR          | F: 5'-GCGGCGACGACTGATCTTA-3'<br>R: 5'-TCCTCCCATCCCACTTTCC-3'                                          |
| <i>MsLBD30</i>  | qRT-PCR          | F: 5'-AAGGGTGTAGTGAAGATTGTAAC-3'<br>R: 5'-GATGAGACCAGCACGACCA-3'                                      |
| <i>MsLBD36</i>  | qRT-PCR          | F: 5'-AAAGCCCTGAATCACAAGC-3'<br>R: 5'-ACCAGCACGACCGTAGAAT-3'                                          |
| <i>MsLBD48</i>  | qRT-PCR          | F: 5'-TGGCGCTGCTGCTATTTGG-3'<br>R: 5'-CGTTCCTCCACTGCCTTCTGT-3'                                        |
| <i>AtNRT1.1</i> | qRT-PCR          | F: 5'-CTGCCACACACTGAACAATTCC-3'<br>R: 5'-CCCGCTTCCTGATCCCTTAT-3'                                      |
| <i>AtNRT2.1</i> | qRT-PCR          | F: 5'-TTGCTTTCTCGGTGCAATCAC-3'<br>R: 5'-TGCTCTGTGTCCACCGGAA-3'                                        |
| <i>AtNIA1</i>   | qRT-PCR          | F: 5'-GGCTACGCTTATTCTGGAGGAGGT-3'<br>R: 5'-TGGTGGTCAAGCTCACAAACACTC-3'                                |
| <i>AtNIA2</i>   | qRT-PCR          | F: 5'-GCCGACGAAGAAGGTTGGTGGTAT-3'<br>R: 5'-GAAGAATCTCCTCGTGACATGGCG-3'                                |
| <i>MsLBD48</i>  | Isolation of CDS | F: 5'-AACAATGATGTCGTCGTGTAAT-3'<br>R: 5'-TCATCATATAAGATTACCCTCTCCA-3'                                 |
| <i>MsLBD48</i>  | over expression  | F: 5'-gaacacgggggactcttgacATGGACAAAGCATGGGGT-3'<br>R: 5'-atttaccctcagatctaccatGTTTCCTGAAAAGTTGCT-3'   |
| <i>MsLBD48</i>  | GFP              | F: 5'-agaacacgggggactcttgaATGGACAAAGCATGGGGT-3'<br>R: 5'-cctttactagttagatctaccatGTTTCCTGAAAAGTTGCT-3' |
